# Supplementary material
Source: publisher figshare collection journal article supplement (https://brill.figshare.com/articles/dataset/_/25151492)
Supplement: Supplementary file 1 [file 1]

Souza et al. Distinguishing Amazonian *ipê* species (*Handroanthus* ) using macroscopic wood anatomy and leaf morphology

Appendix III - Data matrix used for cluster analysis, with the anatomical characteristics of the wood and morphological characteristics of the leaves of *Handroanthus impetiginosus* and *Handroanthus serratifolius* , with binary data 1= presence, 0= absence.
