# Supplementary material
Source: publisher figshare collection journal article supplement (https://brill.figshare.com/articles/dataset/_/25151492)
Supplement: Supplementary file 2 [file 1]

Souza et al. Distinguishing Amazonian *ipê* species (*Handroanthus* ) using macroscopic wood anatomy and leaf morphology  
Appendix I - Data matrix used for cluster analysis, with the characteristics of the woods of *Handroanthus barbatus* , *H. capitatus* , *H. impetiginosus* , *H. incanus* and *H. serratifolius* , being the binary data 1= presence, 0= absence.

| Features                    |                                                   | H. impetiginosus |      |      |      |      |      |      |      |      |      |      |      |      |      |      |      |      |      |      |      | H. serratifolius |       |      |      |      |      |      |      |      |      |      |      |      | H. barbatus |      |      |       | H. capitatus |     |      |      |       | H. incanus |      |      |      |      |      |      |      |      |      |   |   |
|-----------------------------|---------------------------------------------------|------------------|------|------|------|------|------|------|------|------|------|------|------|------|------|------|------|------|------|------|------|------------------|-------|------|------|------|------|------|------|------|------|------|------|------|-------------|------|------|-------|--------------|-----|------|------|-------|------------|------|------|------|------|------|------|------|------|------|---|---|
|                             |                                                   | 5337             | 5338 | 5339 | 5340 | 5349 | 5351 | 5352 | 5353 | 2018 | 3122 | 3124 | 3125 | 3210 | 3242 | 4177 | 4178 | 4179 | 4621 | 4622 | 6738 | 16422            | 20042 | 5341 | 5344 | 5345 | 5347 | 5348 | 5350 | 2129 | 2503 | 2610 | 2793 | 4279 | 4332        | 6624 | 6852 | 16002 | 16731        | 970 | 5432 | 6842 | 13778 | 5329       | 5330 | 5332 | 5335 | 5336 | 5254 | 5257 | 5333 | 5343 | 5346 |   |   |
| Growth rings                | Distinct                                          | 0                | 1    | 1    | 1    | 1    | 1    | 0    | 1    | 1    | 1    | 1    | 1    | 1    | 1    | 1    | 1    | 1    | 0    | 0    | 1    | 1                | 0     | 1    | 0    | 0    | 1    | 1    | 1    | 1    | 1    | 1    | 1    | 1    | 1           | 0    | 1    | 1     | 1            | 1   | 1    | 1    | 1     | 1          | 1    | 1    | 0    | 1    | 1    | 1    | 1    | 1    | 1    |   |   |
|                             | Marked by fiber zones                             | 1                | 1    | 1    | 1    | 1    | 1    | 1    | 1    | 1    | 1    | 1    | 1    | 1    | 1    | 1    | 1    | 1    | 1    | 1    | 1    | 1                | 1     | 1    | 1    | 1    | 1    | 1    | 1    | 1    | 1    | 1    | 1    | 1    | 1           | 1    | 1    | 1     | 1            | 1   | 1    | 1    | 1     | 1          | 1    | 1    | 1    | 1    | 1    | 1    | 1    | 1    | 1    |   |   |
|                             | Marked by marginal parenchyma                     | 1                | 1    | 1    | 1    | 1    | 1    | 1    | 1    | 1    | 1    | 1    | 1    | 1    | 1    | 1    | 1    | 0    | 1    | 1    | 1    | 1                | 1     | 1    | 1    | 1    | 1    | 1    | 1    | 1    | 1    | 1    | 1    | 1    | 1           | 1    | 1    | 1     | 1            | 1   | 1    | 1    | 1     | 1          | 1    | 1    | 1    | 1    | 1    | 1    | 1    | 1    | 1    |   |   |
|                             | Fine texture (diameter of vessel <0,1mm)          | 1                | 1    | 1    | 1    | 1    | 1    | 1    | 0    | 1    | 1    | 1    | 1    | 1    | 1    | 1    | 1    | 1    | 1    | 1    | 1    | 1                | 1     | 1    | 1    | 1    | 1    | 1    | 1    | 1    | 1    | 1    | 1    | 1    | 1           | 1    | 1    | 1     | 1            | 1   | 1    | 1    | 1     | 1          | 1    | 1    | 1    | 1    | 1    | 1    | 1    | 1    | 1    | 1 |   |
|                             | Small vessels (0,06 - 0,10mm)                     | 1                | 1    | 1    | 1    | 1    | 1    | 1    | 0    | 1    | 1    | 1    | 1    | 1    | 1    | 1    | 1    | 1    | 1    | 1    | 1    | 1                | 1     | 1    | 1    | 1    | 1    | 1    | 1    | 1    | 1    | 1    | 1    | 1    | 1           | 1    | 1    | 1     | 1            | 1   | 1    | 1    | 1     | 1          | 1    | 1    | 1    | 1    | 1    | 1    | 1    | 1    | 1    |   |   |
| Vessel density              | Not very numerous (31 – 65/10mm²)                 | 0                | 0    | 0    | 0    | 0    | 0    | 0    | 0    | 0    | 0    | 0    | 0    | 0    | 0    | 0    | 0    | 0    | 0    | 0    | 0    | 0                | 0     | 0    | 0    | 0    | 0    | 0    | 0    | 0    | 0    | 0    | 0    | 0    | 0           | 0    | 0    | 0     | 0            | 0   | 0    | 0    | 0     | 0          | 0    | 0    | 0    | 0    | 0    | 0    | 0    | 0    | 0    |   |   |
|                             | Numerous (66 - 125/10mm²)                         | 0                | 1    | 1    | 1    | 1    | 1    | 1    | 0    | 0    | 1    | 1    | 1    | 1    | 1    | 0    | 0    | 1    | 0    | 0    | 1    | 1                | 1     | 1    | 1    | 1    | 1    | 1    | 1    | 1    | 1    | 1    | 1    | 1    | 1           | 1    | 1    | 1     | 1            | 1   | 1    | 1    | 1     | 0          | 1    | 0    | 1    | 0    | 0    | 0    | 0    | 1    | 1    |   |   |
|                             | Very numerous (126 - 250/10mm²)                   | 1                | 1    | 1    | 1    | 1    | 1    | 1    | 1    | 1    | 0    | 1    | 1    | 1    | 0    | 1    | 1    | 1    | 1    | 1    | 1    | 1                | 0     | 1    | 1    | 1    | 0    | 1    | 1    | 1    | 1    | 1    | 1    | 1    | 1           | 0    | 1    | 1     | 0            | 1   | 0    | 0    | 1     | 1          | 1    | 1    | 1    | 1    | 1    | 1    | 1    | 1    | 1    |   |   |
|                             | In large numbers (>251/10mm²)                     | 0                | 0    | 0    | 0    | 0    | 0    | 0    | 0    | 0    | 0    | 0    | 0    | 0    | 0    | 0    | 0    | 0    | 0    | 0    | 0    | 0                | 0     | 0    | 0    | 0    | 0    | 0    | 0    | 0    | 0    | 0    | 0    | 0    | 0           | 0    | 0    | 0     | 0            | 0   | 0    | 0    | 0     | 0          | 0    | 0    | 0    | 0    | 0    | 0    | 0    | 0    | 0    |   |   |
|                             | Multiple in long chains (5 vessels)               | 0                | 0    | 0    | 0    | 0    | 0    | 0    | 0    | 0    | 0    | 0    | 0    | 0    | 0    | 0    | 0    | 0    | 1    | 0    | 0    | 0                | 0     | 0    | 0    | 0    | 0    | 0    | 0    | 0    | 0    | 0    | 0    | 0    | 0           | 0    | 0    | 0     | 0            | 0   | 0    | 0    | 0     | 0          | 0    | 0    | 0    | 0    | 0    | 0    | 0    | 0    | 0    |   |   |
|                             | Multiple in clusters                              | 0                | 1    | 1    | 0    | 0    | 0    | 1    | 0    | 0    | 0    | 0    | 0    | 0    | 0    | 0    | 1    | 0    | 1    | 1    | 0    | 0                | 0     | 0    | 0    | 0    | 0    | 0    | 0    | 0    | 1    | 0    | 0    | 0    | 0           | 0    | 0    | 0     | 0            | 0   | 0    | 0    | 0     | 0          | 0    | 0    | 0    | 0    | 0    | 0    | 0    | 0    | 0    | 0 |   |
|                             | Tendency to diagonal pattern                      | 1                | 0    | 0    | 0    | 1    | 1    | 0    | 0    | 0    | 0    | 1    | 0    | 0    | 0    | 1    | 0    | 0    | 1    | 1    | 0    | 0                | 0     | 0    | 0    | 0    | 0    | 0    | 0    | 0    | 0    | 0    | 0    | 0    | 0           | 0    | 0    | 0     | 0            | 0   | 0    | 0    | 0     | 0          | 0    | 0    | 0    | 0    | 0    | 0    | 0    | 0    | 0    |   |   |
|                             | Tendency to radial pattern                        | 0                | 0    | 0    | 0    | 0    | 0    | 0    | 0    | 0    | 0    | 0    | 0    | 0    | 0    | 0    | 0    | 0    | 1    | 0    | 0    | 0                | 0     | 0    | 0    | 0    | 0    | 0    | 0    | 0    | 0    | 0    | 0    | 0    | 0           | 0    | 0    | 0     | 0            | 0   | 0    | 0    | 0     | 0          | 0    | 0    | 0    | 0    | 0    | 0    | 0    | 0    | 0    |   |   |
| Vessel obstruction          | Partial (< 60%)                                   | 1                | 1    | 0    | 0    | 0    | 0    | 0    | 0    | 1    | 0    | 0    | 0    | 1    | 1    | 1    | 0    | 1    | 0    | 0    | 1    | 1                | 0     | 1    | 0    | 0    | 0    | 0    | 0    | 0    | 0    | 0    | 0    | 0    | 0           | 0    | 0    | 0     | 0            | 1   | 1    | 0    | 1     | 1          | 1    | 1    | 1    | 1    | 0    | 0    | 0    | 1    | 0    | 0 | 1 |
|                             | Majority (> 60%)                                  | 0                | 0    | 1    | 1    | 1    | 1    | 1    | 0    | 1    | 1    | 1    | 0    | 0    | 0    | 1    | 0    | 1    | 1    | 1    | 0    | 0                | 1     | 0    | 1    | 1    | 1    | 1    | 1    | 1    | 1    | 1    | 0    | 1    | 1           | 1    | 1    | 0     | 0            | 1   | 0    | 0    | 0     | 1          | 1    | 1    | 0    | 0    | 0    | 0    | 1    | 0    | 0    | 1 |   |
|                             | Orange colored substance                          | 0                | 1    | 1    | 1    | 1    | 1    | 1    | 0    | 1    | 0    | 0    | 0    | 0    | 1    | 1    | 0    | 1    | 1    | 1    | 1    | 0                | 1     | 1    | 0    | 1    | 1    | 1    | 1    | 1    | 1    | 1    | 1    | 1    | 0           | 1    | 0    | 1     | 0            | 0   | 0    | 0    | 1     | 1          | 1    | 1    | 1    | 1    | 1    | 1    | 1    | 1    | 1    | 1 |   |
|                             | Blackened substance                               | 0                | 0    | 1    | 1    | 1    | 0    | 1    | 1    | 0    | 0    | 0    | 0    | 0    | 0    | 0    | 0    | 0    | 1    | 1    | 1    | 0                | 1     | 0    | 0    | 0    | 1    | 0    | 0    | 0    | 0    | 0    | 0    | 0    | 0           | 0    | 0    | 0     | 0            | 0   | 0    | 0    | 0     | 0          | 0    | 0    | 0    | 0    | 0    | 0    | 0    | 0    | 0    | 0 |   |
| Axial parenchyma            | Visible with the naked eye                        | 0                | 0    | 0    | 0    | 0    | 0    | 0    | 0    | 0    | 0    | 0    | 0    | 0    | 0    | 0    | 0    | 0    | 0    | 0    | 0    | 0                | 0     | 0    | 0    | 0    | 0    | 0    | 0    | 0    | 0    | 0    | 0    | 0    | 0           | 0    | 0    | 0     | 0            | 0   | 0    | 0    | 0     | 0          | 0    | 0    | 0    | 0    | 0    | 0    | 0    | 0    | 0    |   |   |
|                             | Contrasted                                        | 1                | 1    | 1    | 1    | 1    | 1    | 1    | 1    | 1    | 1    | 1    | 1    | 1    | 1    | 1    | 1    | 1    | 1    | 1    | 1    | 1                | 1     | 1    | 1    | 1    | 1    | 1    | 1    | 0    | 1    | 1    | 0    | 1    | 1           | 1    | 1    | 1     | 1            | 1   | 1    | 1    | 1     | 1          | 1    | 1    | 1    | 1    | 1    | 1    | 1    | 1    | 1    |   |   |
|                             | Scanty                                            | 1                | 1    | 1    | 1    | 1    | 1    | 1    | 1    | 1    | 0    | 0    | 0    | 1    | 1    | 0    | 0    | 0    | 1    | 1    | 0    | 0                | 1     | 0    | 0    | 0    | 1    | 0    | 0    | 1    | 0    | 0    | 0    | 1    | 1           | 0    | 1    | 0     | 0            | 0   | 0    | 0    | 0     | 0          | 0    | 0    | 0    | 0    | 0    | 0    | 0    | 0    | 0    |   |   |
|                             | Short-finned linear aliform                       | 1                | 1    | 1    | 1    | 1    | 1    | 1    | 1    | 1    | 1    | 1    | 1    | 1    | 1    | 1    | 1    | 1    | 0    | 0    | 1    | 1                | 1     | 1    | 1    | 1    | 1    | 0    | 1    | 0    | 1    | 1    | 0    | 1    | 0           | 1    | 1    | 0     | 0            | 0   | 0    | 0    | 0     | 0          | 0    | 0    | 0    | 0    | 0    | 0    | 0    | 0    | 0    |   |   |
|                             | Short-finned lozenge aliform                      | 0                | 0    | 0    | 0    | 0    | 0    | 1    | 0    | 1    | 1    | 0    | 1    | 0    | 1    | 1    | 1    | 0    | 1    | 1    | 0    | 1                | 0     | 1    | 1    | 1    | 1    | 1    | 1    | 1    | 1    | 1    | 1    | 0    | 1           | 1    | 1    | 1     | 1            | 1   | 1    | 1    | 1     | 1          | 1    | 1    | 0    | 1    | 0    | 0    | 1    | 1    |      |   |   |
|                             | Confluent in long stretches tending to form bands | 0                | 0    | 0    | 0    | 0    | 0    | 0    | 0    | 0    | 1    | 0    | 0    | 0    | 1    | 0    | 0    | 0    | 0    | 0    | 0    | 0                | 0     | 1    | 0    | 1    | 0    | 1    | 1    | 1    | 1    | 1    | 1    | 1    | 1           | 0    | 1    | 1     | 1            | 1   | 1    | 1    | 1     | 1          | 1    | 1    | 1    | 1    | 1    | 1    | 1    | 1    |      |   |   |
|                             | Unilateral                                        | 0                | 1    | 0    | 1    | 1    | 1    | 1    | 1    | 1    | 1    | 1    | 0    | 0    | 1    | 1    | 1    | 1    | 1    | 1    | 1    | 1                | 1     | 1    | 1    | 1    | 1    | 1    | 1    | 1    | 1    | 1    | 1    | 1    | 1           | 1    | 1    | 1     | 1            | 0   | 0    | 0    | 0     | 1          | 1    | 1    | 1    | 0    | 1    | 1    | 1    | 1    |      |   |   |
|                             | Marginal lines                                    | 1                | 1    | 1    | 1    | 1    | 1    | 1    | 1    | 1    | 1    | 1    | 0    | 1    | 1    | 1    | 1    | 0    | 1    | 1    | 1    | 1                | 1     | 1    | 1    | 1    | 1    | 1    | 1    | 1    | 1    | 1    | 1    | 1    | 1           | 1    | 1    | 1     | 1            | 1   | 1    | 1    | 1     | 1          | 1    | 1    | 1    | 1    | 1    | 1    | 1    | 1    | 1    |   |   |
|                             | Little abundant (5 - 24,99%)                      | 1                | 1    | 1    | 1    | 1    | 1    | 1    | 1    | 1    | 1    | 1    | 1    | 1    | 1    | 1    | 1    | 1    | 1    | 1    | 1    | 1                | 1     | 1    | 0    | 0    | 0    | 1    | 0    | 1    | 1    | 1    | 1    | 1    | 1           | 1    | 1    | 1     | 0            | 0   | 0    | 0    | 0     | 0          | 1    | 0    | 1    | 0    | 1    | 1    | 1    | 1    | 1    |   |   |
|                             | Abundant (25 - 34,99%)                            | 0                | 0    | 0    | 0    | 0    | 0    | 0    | 0    | 0    | 0    | 0    | 0    | 0    | 0    | 0    | 0    | 0    | 0    | 0    | 0    | 0                | 0     | 0    | 0    | 1    | 1    | 1    | 0    | 1    | 0    | 0    | 0    | 0    | 0           | 0    | 0    | 0     | 0            | 0   | 0    | 0    | 0     | 0          | 0    | 0    | 0    | 0    | 0    | 0    | 0    | 0    | 0    |   |   |
| Very abundant (35 - 49,99%) | 0                                                 | 0                | 0    | 0    | 0    | 0    | 0    | 0    | 0    | 0    | 0    | 0    | 0    | 0    | 0    | 0    | 0    | 0    | 0    | 0    | 0    | 0                | 0     | 0    | 0    | 0    | 0    | 0    | 0    | 0    | 0    | 0    | 0    | 0    | 0           | 0    | 0    | 0     | 0            | 0   | 0    | 0    | 0     | 0          | 0    | 0    | 0    | 0    | 0    | 0    | 0    | 0    |      |   |   |
| Ray density/5 mm            | Rare (< 25/5mm)                                   | 0                | 1    | 0    | 0    | 0    | 0    | 0    | 0    | 1    | 1    | 0    | 0    | 0    | 0    | 0    | 0    | 1    | 1    | 1    | 0    | 0                | 0     | 0    | 0    | 0    | 0    | 0    | 0    | 0    | 0    | 0    | 0    | 0    | 0           | 0    | 0    | 0     | 0            | 0   | 0    | 0    | 0     | 0          | 0    | 0    | 0    | 0    | 0    | 0    | 0    | 0    | 0    | 0 |   |
|                             | Few (26 – 50/5mm)                                 | 1                | 1    | 1    | 1    | 1    | 1    | 1    | 1    | 1    | 1    | 1    | 1    | 1    | 1    | 1    | 1    | 1    | 1    | 1    | 1    | 1                | 1     | 1    | 1    | 1    | 1    | 1    | 1    | 1    | 1    | 1    | 1    | 1    | 1           | 1    | 1    | 1     | 1            | 1   | 1    | 1    | 0     | 1          | 1    | 0    | 1    | 1    | 1    | 1    | 1    | 1    | 1    |   |   |
|                             | Numerous (51 - 80/5mm)                            | 0                | 0    | 0    | 0    | 0    | 0    | 0    | 0    | 0    | 0    | 0    | 0    | 0    | 0    | 0    | 0    | 0    | 0    | 0    | 0    | 1                | 0     | 0    | 0    | 0    | 0    | 1    | 1    | 1    | 1    | 1    | 0    | 0    | 0           | 0    | 0    | 0     | 0            | 0   | 0    | 0    |       |            |      |      |      |      |      |      |      |      |      |   |   |
