# Supplementary material
Source: publisher figshare collection journal article supplement (https://brill.figshare.com/articles/dataset/_/25151492)
Supplement: Supplementary file 3 [file 1]

Souza et al. Distinguishing Amazonian *ipê* species (*Handroanthus*) using macroscopic wood anatomy and leaf morphology

Appendix II - Data matrix used for cluster analysis, with morphological characteristics of the leaves of *Handroanthus impetiginosus* and *Handroanthus serratifolius*, with binary data 1= presence, 0= absence.

| Species                                 | <i>H. impetiginosus</i> |     |     |     |      |      |        |        |        |        |        |        |        | <i>H. serratifolius</i> |        |        |        |
|-----------------------------------------|-------------------------|-----|-----|-----|------|------|--------|--------|--------|--------|--------|--------|--------|-------------------------|--------|--------|--------|
|                                         | 665                     | 667 | 669 | 670 | 1212 | 1222 | 221780 | 221781 | 221782 | 221783 | 221785 | 221792 | 221794 | 221788                  | 221791 | 110705 | 136313 |
| Serrated leaflet margin                 | 0                       | 0   | 0   | 0   | 0    | 0    | 0      | 0      | 0      | 0      | 0      | 0      | 0      | 1                       | 1      | 1      | 1      |
| Crypt like domatia                      | 0                       | 0   | 0   | 0   | 0    | 0    | 0      | 0      | 0      | 0      | 0      | 0      | 0      | 1                       | 1      | 1      | 1      |
| Tuft of hair type domatia               | 1                       | 1   | 1   | 1   | 0    | 0    | 1      | 0      | 1      | 1      | 0      | 1      | 1      | 0                       | 0      | 0      | 0      |
| Lepidotes on the adaxial surface        | 1                       | 1   | 1   | 1   | 1    | 1    | 1      | 1      | 1      | 1      | 1      | 1      | 1      | 0                       | 1      | 0      | 0      |
| Lepidotes on the abaxial surface        | 0                       | 0   | 0   | 0   | 1    | 1    | 1      | 1      | 1      | 1      | 1      | 1      | 1      | 1                       | 1      | 0      | 0      |
| Scattered glands on the adaxial surface | 0                       | 0   | 0   | 0   | 0    | 0    | 0      | 0      | 0      | 0      | 0      | 0      | 0      | 1                       | 0      | 1      | 1      |
| Scattered glands on the abaxial surface | 0                       | 0   | 0   | 0   | 1    | 1    | 1      | 1      | 0      | 1      | 0      | 1      | 1      | 0                       | 0      | 0      | 0      |
